# Supplementary material for: Outcome of 2 cc pure sulfur hexafluoride gas tamponade for macular hole surgery
Source: BMC Ophthalmol. 2016 Jun 3;16:73. doi: 10.1186/s12886-016-0254-9 (PMC4891936; doi:10.1186/s12886-016-0254-9)
Supplement: Additional file 1: — Raw data. (XLSX 19 kb) [file 12886_2016_254_MOESM1_ESM.xlsx]

## Sheet: Sheet1
MR no	Sex	Age	Eye	Dur of sym	Preop VA	LogMAR	Hole size	Stage	Lens	POD 1 GB	Postop VA @ 6m	LogMAR	Hole status	VA line change	Preop IOP	Postop IOP	IOP change	Phaco										last visit	last bcva	pvd
3344545	f	60	LE	9	0.25	0.6	584	4	pciol	75	0.33	0.5	closed	1	17	11	-6
3353166	f	64	RE	12	0.16	0.8	669	4	pciol	80	0.25	0.6	closed	1	10	12	2
3366255	m	74	LE	3	0.25	0.6	278	3	Cat	80	0.33	0.5	closed	1	17	21	4	yes
3299435	m	56	LE	4	0.33	0.5	367	3	cl	90	1	0	closed	3	15	12	-3
3297781	m	70	LE	5	0.16	0.8	418	4	Cat	75	0.5	0.3	closed	3	17	35	18	yes
1464736	f	58	RE	6	0.16	0.8	519	4	cl	75	0.67	0.2	closed	4	16	17	1
3356922	f	66	RE	5	0.16	0.8	490	3	pciol	80	0.5	0.3	closed	3	12	17	5
3201643	m	60	LE	4	0.1	1	502	3	Cat	50	0.1	1	open	0	12	13	1	yes
3210167	f	57	RE	4	0.5	0.3	564	3	Cat	90	0.67	0.2	closed	1	16	11	-5	yes
3192473	m	66	LE	2	0.5	0.3	267	4	pciol	80	1	0	closed	2	17	17	0
3287657	f	65	LE	5	0.16	0.8	566	3	cl	70	0.67	0.2	open	4	17	16	-1	yes
3276644	f	63	LE	7	0.08	1.1	690	4	Cat	70	0.33	0.5	closed	4	15	17	2	yes
3267865	f	55	LE	3	0.5	0.3	324	2	Cat	90	0.67	0.2	closed	1	15	15	0	yes
3354886	m	60	RE	4	0.16	0.8	384	4	Cat	80	0.33	0.5	closed	2	14	15	1	yes
3356878	f	57	RE	4	0.08	1.1	548	4	Cat	80	0.25	0.6	closed	3	18	20	2	yes
3452285	f	60	RE	2	0.33	0.5	367	4	Cat	70	0.33	0.5	open	0	17	18	1	yes
1257828	m	63	LE	4	0.33	0.5	356	2	Cat	70	0.67	0.2	closed	3	16	15	-1	yes
3420719	m	59	RE	3	0.25	0.6	300	2	pciol	80	0.67	0.2	closed	3	10	10	0
3375507	m	68	RE	5	0.1	1	489	4	cl	70	0.5	0.3	closed	4	13	15	2
3446999	f	67	LE	5	0.16	0.8	522	4	Cat	80	0.16	0.8	closed	0	17	16	-1	yes
3463912	f	56	RE	3	0.25	0.6	309	3	Cat	80	0.33	0.5	closed	1	16	19	3	yes
2642212	f	61	RE	6	0.25	0.6	786	4	Cat	70	0.25	0.6	open	0	16	19	3	yes
3272600	f	53	LE	3	0.5	0.3	360	4	Cat	80	0.5	0.3	closed	0	13	14	1	yes
3358259	f	60	LE	3	0.1	1	296	4	Cat	60	0.33	0.5	closed	3	17	12	-5	yes
3650704	f	60	LE	8	0.16	0.8	703	4	Cat	70	0.25	0.6	closed	1	11	14	3	yes
3138943	f	68	LE	5	0.1	1	461	4	Cat	80	0.5	0.3	closed	4	20	30	10	yes
3553752	m	66	LE	5	0.16	0.8	667	4	Cat	70	0.25	0.6	closed	1	12	13	1	yes
3625073	f	56	RE	8	0.16	0.8	921	4	Cat	70	0.25	0.6	closed	1	13	14	1	yes
3312438	f	75	RE	7	0.06	1.2	830	4	Cat	60	0.25	0.6	closed	4	14	13	-1	yes
3682317	m	63	RE	4	0.25	0.6	485	4	pciol	70	0.5	0.3	closed	2	12	32	20
3688554	f	59	RE	6	0.16	0.8	736	4	Cat	70	0.5	0.3	closed	3	17	17	0	yes
3576630	m	69	LE	4	0.25	0.6	335	4	Cat	70	0.5	0.3	closed	2	16	16	0	yes
3554669	f	66	RE	3	0.25	0.6	290	2	Cat	70	0.5	0.3	closed	2	18	12	-6	yes
3573714	m	63	RE	4	0.33	0.5	385	2	Cat	70	1	0	closed	3	15	18	3	yes
3574383	f	61	RE	7	0.1	1	860	4	cl	70	0.16	0.8	closed	1	17	16	-1
3586809	f	64	LE	3	0.25	0.6	234	3	Cat	70	0.33	0.5	closed	1	13	15	2	yes
3626983	m	65	RE	8	0.25	0.6	900	4	pciol	70	0.25	0.6	closed	0	14	13	-1
3628907	f	63	RE	4	0.33	0.5	364	4	Cat	70	0.67	0.2	closed	2	16	17	1	yes
3630029	m	53	RE	3	0.16	0.8	274	3	pciol	70	0.5	0.3	closed	3	18	28	10
3631525	f	53	LE	2	0.16	0.8	310	2	cl	70	0.33	0.5	closed	2	14	15	1
3643804	m	44	LE	5	0.1	1	652	4	cl	70	0.25	0.6	closed	3	16	19	3
3584694	f	59	RE	10	0.16	0.8	891	4	Cat	70	0.33	0.5	closed	2	15	14	-1	yes
3613755	m	61	LE	2	0.33	0.5	276	4	Cat	70	0.33	0.5	closed	0	17	19	2	yes
3614161	m	65	RE	3	0.33	0.5	259	4	cl	70	0.67	0.2	closed	2	11	27	16
3584537	f	69	RE	6	0.5	0.3	516	4	cl	70	0.67	0.2	closed	1	13	14	1
3763882	m	60	RE	6	0.1	1	550	4	pciol	70	0.33	0.5	closed	3	12	13	1
3702615	m	60	RE	12	0.16	0.8	1802	4	Cat	70	0.16	0.8	closed with defect	0	13	13	0	yes
3703574	f	54	RE	4	0.16	0.8	475	4	Cat	70	0.67	0.2	closed	4	16	13	-3	yes
3390404	f	55	RE	1	0.16	0.8	383	3	pciol	70	0.5	0.3	closed	3	18	16	-2
3707964	m	56	RE	1	0.33	0.5	318	2	Cat	70	0.5	0.3	closed	1	18	18	0	yes
3656753	f	58	LE	4	0.1	1	589	4	Cat	70	0.33	0.5	closed	3	15	14	-1	yes
3747668	f	66	LE	5	0.25	0.6	545	4	Cat	60	0.25	0.6	closed	0	19	21	2	yes
3699387	m	64	RE	6	0.16	0.8	356	2	Cat	70	0.67	0.2	closed	4	19	17	-2	yes
3658738	m	55	RE	4	0.33	0.5	534	4	Cat	70	0.33	0.5	closed	0	16	14	-2	yes
3542154	m	59	LE	2	0.16	0.8	460	4	Cat	70	0.5	0.3	closed	3	19	20	1	yes
3528537	f	69	LE	3	0.1	1	485	4	Cat	60	0.25	0.6	closed	2	14	19	5	yes
3521487	m	67	RE	7	0.25	0.6	516	4	Cat	70	0.67	0.2	closed	3	15	14	-1	yes
3577070	f	63	LE	2	0.16	0.8	247	2	Cat	70	0.33	0.5	closed	2	16	15	-1	yes
3515582	f	65	LE	4	0.1	1	486	4	cl	70	0.5	0.3	closed	4	12	16	4
3494350	m	50	RE	6	0.25	0.6	363	4	cl	70	0.25	0.6	closed	0	10	12	2
3552334	f	63	RE	0.5	0.25	0.6	489	4	cl	70	0.33	0.5	closed	1	16	14	-2
3827691	f	65	LE	6	0.1	1	519	4	cl	70	0.5	0.3	closed	4	10	10	0
3762142	f	68	RE	0.3	0.16	0.8	815	4	Cat	70	0.1	1	closed with defect	-1	14	14	0	yes
1416574	f	58	LE	2	0.5	0.3	545	4	cl	70	0.5	0.3	closed	0	15	16	1
3612076	m	63	LE	6	0.25	0.6	530	4	pciol	70	0.33	0.5	closed	1	15	15	0
3606980	m	63	RE	1	0.16	0.8	401	4	Cat	70	0.33	0.5	closed	2	15	12	-3	yes
3593462	f	61	RE	2	0.33	0.5	749	4	cl	70	0.33	0.5	closed	0	11	12	1
3593462	f	60	LE	2	0.33	0.5	924	4	Cat	70	0.25	0.6	closed	-1	11	16	5	yes
3595023	f	65	LE	12	0.1	1	762	4	Cat	70	0.33	0.5	closed	2	13	13	0	yes
3765673	m	63	RE	5	0.25	0.6	705	4	pciol	70	0.25	0.6	closed	0	14	17	3
3728519	m	73	RE	1	0.33	0.5	474	4	pciol	70	0.5	0.3	closed	2	17	12	-5
3603199	f	58	RE	3	0.33	0.5	365	4	Cat	70	1	0	closed	3	11	9	-2	yes
3674301	f	61	LE	6	0.25	0.6	603	4	Cat	70	0.5	0.3	closed	2	13	21	8	yes
3726384	m	58	LE	2	0.33	0.5	469	4	Cat	70	0.67	0.2	closed	2	18	21	3	yes
3139607	f	61	RE	3	0.1	1	467	4	Cat	70	0.25	0.6	closed	2	15	16	1	yes
3728519	m	73	LE	5	0.33	0.5	570	4	Cat	80	0.67	0.2	closed	2	12	18	6	yes
